# Supplementary material for: Methanol synthesis via CO2hydrogenation over a Au/ZnO catalyst: an isotope labelling study on the role of CO in the reaction process
Source: Royal Society of Chemistry journal article supplement (doi:10.1039/c5cp06888f), 2016-01-01

## Supporting Information

### Mechanism of Methanol Synthesis from CO<sub>2</sub>/CO/H<sub>2</sub> Mixtures over Au/ZnO Catalyst: An Isotope Labelling Study

Yeusy Hartadi, Daniel Widmann, and R. Jürgen Behm<sup>1</sup>

Institute of Surface Chemistry and Catalysis, Ulm University,

D-89081 Ulm, Albert-Einstein-Allee 47, Germany

Table S1 TOFs of total amount of MeOH produced, amount of MeOH formed from CO<sub>2</sub> and MeOH formed from CO obtained during hydrogenation of a 15% <sup>13</sup>CO<sub>2</sub>/15% <sup>12</sup>CO/45% H<sub>2</sub> mixture at 5 bar at steady-state conditions over Au/ZnO catalyst (STREM Chemicals) as a function of temperature (240 – 300°C).

| Temperature / °C | Total MeOH TOF / 10 <sup>-3</sup> s <sup>-1</sup> | MeOH from CO <sub>2</sub> TOF / 10 <sup>-3</sup> s <sup>-1</sup> | MeOH from CO TOF / 10 <sup>-3</sup> s <sup>-1</sup> |
|------------------|---------------------------------------------------|------------------------------------------------------------------|-----------------------------------------------------|
| 240              | 1.5                                               | 1.2                                                              | 0.3                                                 |
| 270              | 3.6                                               | 2.7                                                              | 0.9                                                 |
| 300              | 4.4                                               | 3.0                                                              | 1.4                                                 |

Fig. S1 MeOH (■) and CO (●) formation rates as well as selectivity (◆) during CO<sub>2</sub> hydrogenation with increasing CO<sub>2</sub> concentration between 15 – 30% in the CO<sub>2</sub>/H<sub>2</sub>/Ar reaction gas mixture at 5 bar and 240°C on a Au/ZnO catalyst (STREM Chemicals) after calcination in 20 Nml min<sup>-1</sup> in 1% O<sub>2</sub>/Ar at 400°C for 1 h (O400).

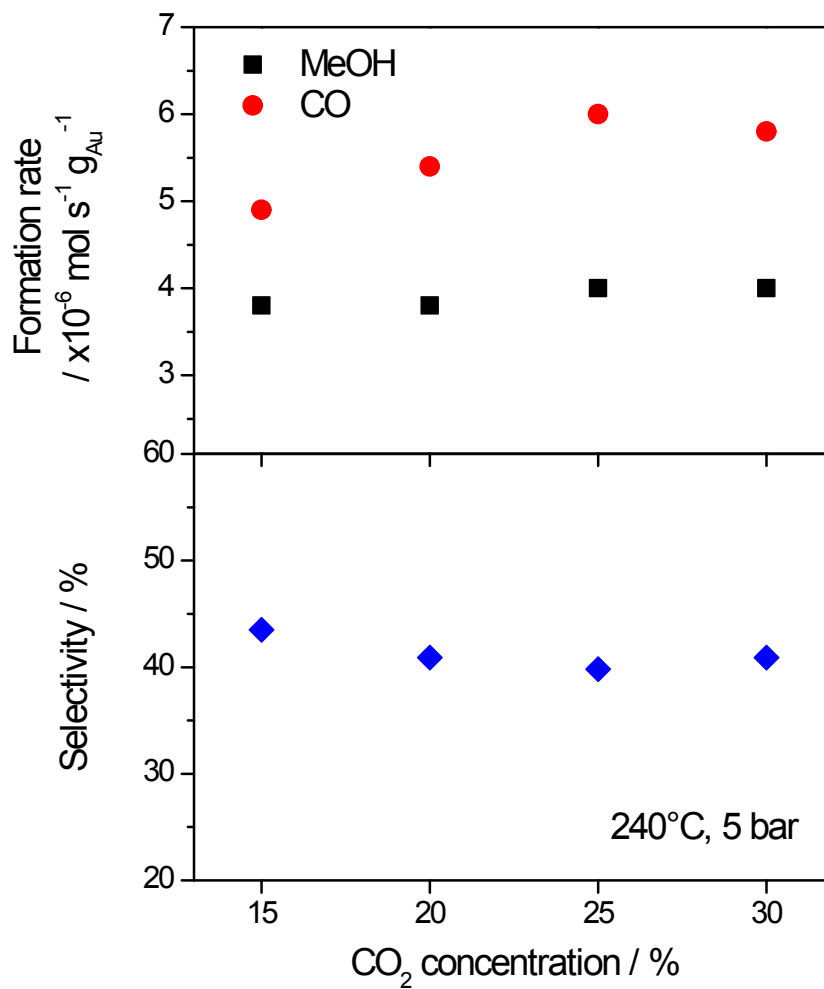

Supplement: c5cp06888f1.pdf [file c5cp06888f1.pdf]
